# Supplementary material
Source: PubMed Central journal article supplement (PMC8984906)
Supplement: ajcr0012-1102-f7.pdf [file ajcr0012-1102-f7.pdf]

## PIK-75 overcomes venetoclax resistance in MCL

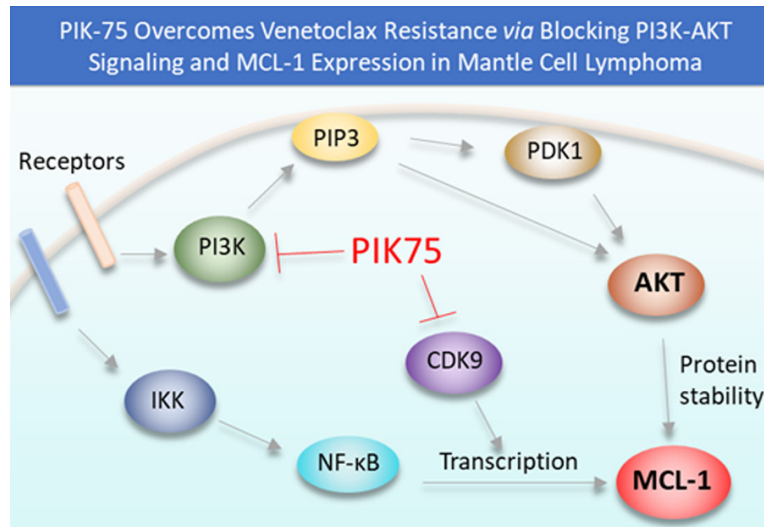

**Supplementary Figure 1.** Proposed model for the mechanism of action of PIK75 in overcoming venetoclax resistance in MCL. Aberrant PI3K-AKT signaling and MCL-1 expression contribute to venetoclax resistance in MCL cells. PIK75 targets PI3K to inhibit cell survival mediated by PI3K-AKT-signaling and targets CDK9 to block CDK9-mediated gene transcription, leading to diminished expression of MCL-1.
